# Supplementary material for: In-Situ Construction of Anti-Aggregation Tellurium Nanorods/Reduced Graphene Oxide Composite to Enable Fast Sodium Storage
Source: MDPI journal article supplement (doi:10.3390/nano14010118), 2024-01-03
Supplement: s1 [file s1]

# In-Situ Construction of Anti-Aggregation Tellurium Nanorods/Reduced Graphene Oxide Composite to Enable Fast Sodium Storage

Haiguo Hu <sup>1</sup>, Jiarui Zhong <sup>3</sup>, Bangquan Jian <sup>3</sup>, Cheng Zheng <sup>3,\*</sup>, Yonghong Zeng <sup>1</sup>, Cuiyun Kou <sup>2</sup>, Quanlan Xiao <sup>1,\*</sup>, Yiyu Luo <sup>2</sup>, Huide Wang <sup>1</sup>, Zhinan Guo <sup>2,\*</sup> and Li Niu <sup>4,\*</sup>

- <sup>1</sup> International Collaborative Laboratory of 2D Materials for Optoelectronics Science and Technology, Institute of Microscale Optoelectronics, Shenzhen University, Shenzhen 518060, China; huhaiguo916@szu.edu.cn (H.H.); 1800282021@email.szu.edu.cn (Y.Z.); wanghuide@szu.edu.cn (H.W.)
- <sup>2</sup> Guangzhou Key Laboratory of Sensing Materials and Devices, Center for Advanced Analytical Science, School of Chemistry and Chemical Engineering, Guangzhou University, Guangzhou 510006, China; koucuiyun@gzhu.edu.cn (C.K.); 2112105089@gzhu.edu.cn (Y.L.)
- <sup>3</sup> Material and Energy School, Guangdong University of Technology, Guangzhou 510006, China; 2112102119@mail2.gdut.edu.cn (J.Z.); 2112002042@mail2.gdut.edu.cn (B.J.)
- <sup>4</sup> School of Chemical Engineering and Technology, Sun Yat-sen University, Guangzhou 510006, China
- \* Correspondence: guozhinan@gzhu.edu.cn (Z.G.); zhengcheng@gdut.edu.cn (C.Z.); xiaoql@szu.edu.cn (Q.X.); niuli@mail.sysu.edu.cn (L.N.)

## **Supporting Information**

### **Experiment**

#### **Materials**

Bulk tellurium powder (99.99%, 200 mesh) was obtained from Macklin. Polyvinylpyrrolidone (PVP, MW ca. 58000) and sodium borohydride ( $\text{NaBH}_4$ , 98%) were purchased from Aladdin. Unless otherwise noted, all solvents used were of analytical reagent grade without further purification. Deionized water was produced from a Milli-Q water purification system.

#### **Preparation of Sodium Hydrogen Telluride ( $\text{NaHTe}$ )**

$\text{NaHTe}$  was synthesized through a simple redox reaction [39]. Briefly, 0.34 g of  $\text{NaBH}_4$  was dissolved in 6 mL of deionized water and then 0.51 g of Te powder was quickly added. Thereafter, the reaction vessel was sealed with a rubber stopper. Besides, a small pinhole was provided on the rubber stopper to ensure that  $\text{H}_2$  generated by the reaction is discharged in time. During the reaction, the system was stirred and cooled in an ice-water bath to allow the reaction to proceed uniformly and slowly. After about 8 h, the black Te powder disappeared and a white sodium tetraborate precipitate was produced. The upper clear supernatant after stopping stirring for a while was the prepared  $\text{NaHTe}$  solution.

## Results and Discussion

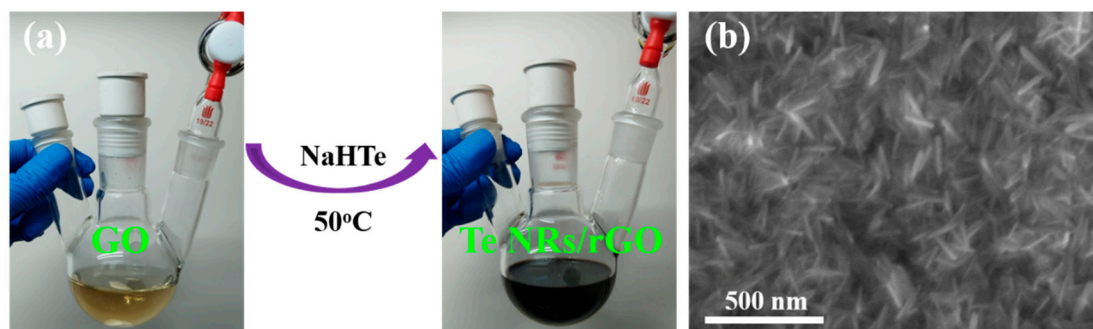

**Figure S1.** (a) Photographs of the GO and Te NRs/rGO-310 aqueous solution; (b) SEM image of Te NRs/rGO-310.

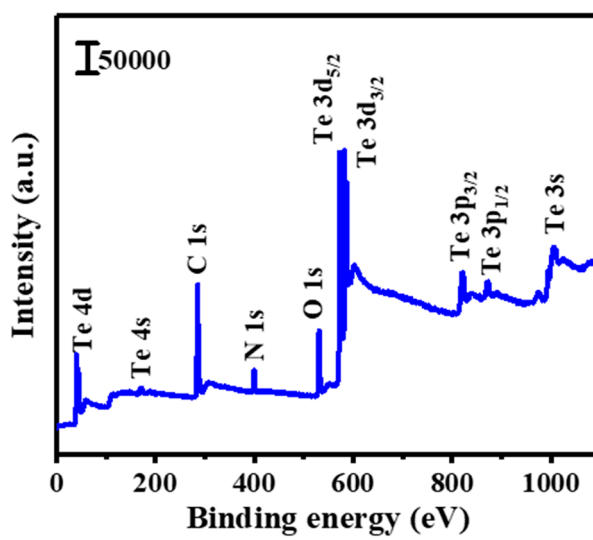

**Figure S2.** XPS full spectrum of Te NRs/rGO-310.

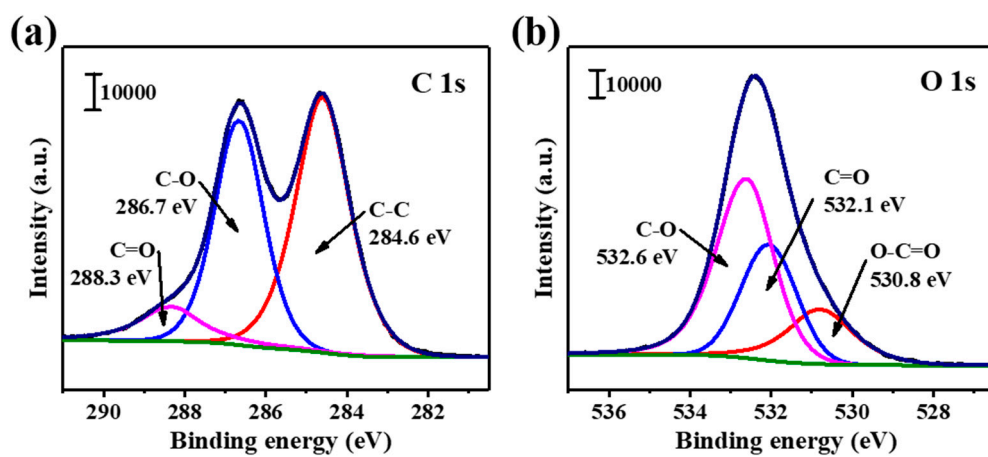

**Figure S3.** XPS full spectrum, (a) C 1s and (b) O 1s of GO.

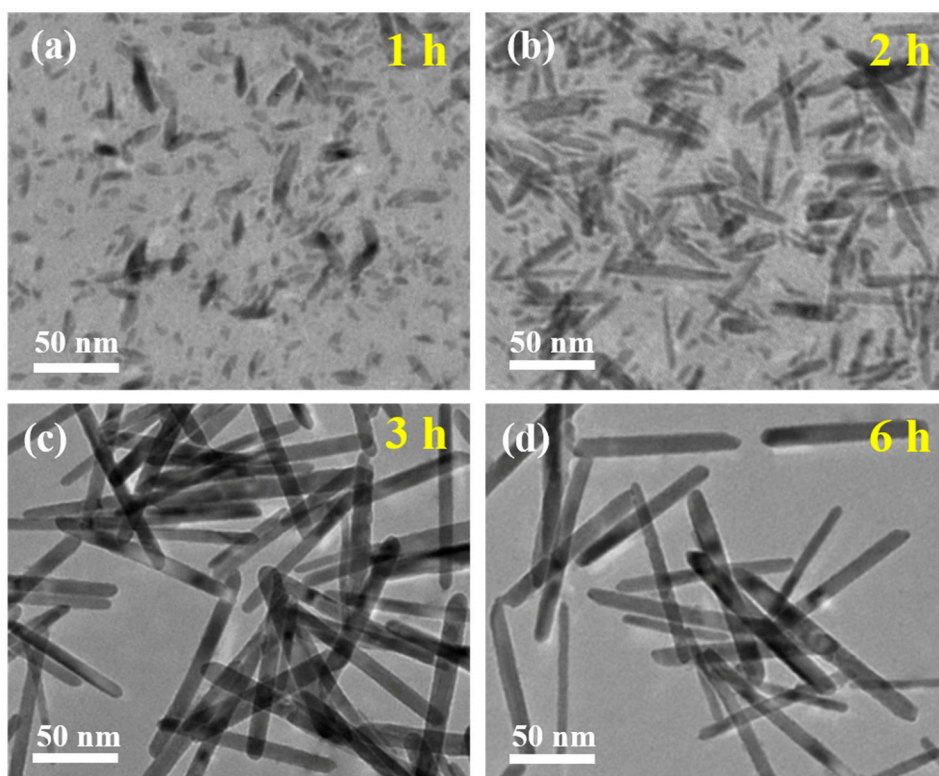

**Figure S4.** TEM images of Te NRs/rGO-310 at (a) 1 h, (b) 2 h, (c) 3 h and (d) 6 h.

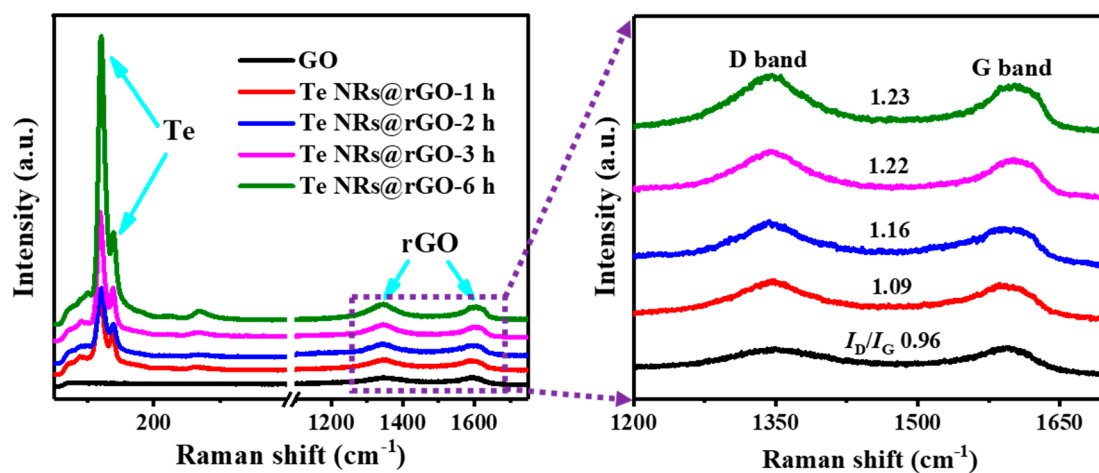

**Figure S5.** Raman spectra of Te NRs/rGO-310 at (a) 1 h, (b) 2 h, (c) 3 h and (d) 6 h.

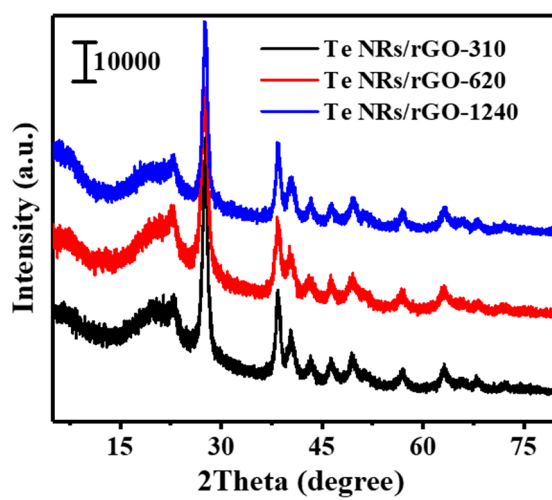

**Figure S6.** XRD patterns of Te NRs/rGO-310, Te NRs/rGO-620 and Te NRs/rGO-1240.

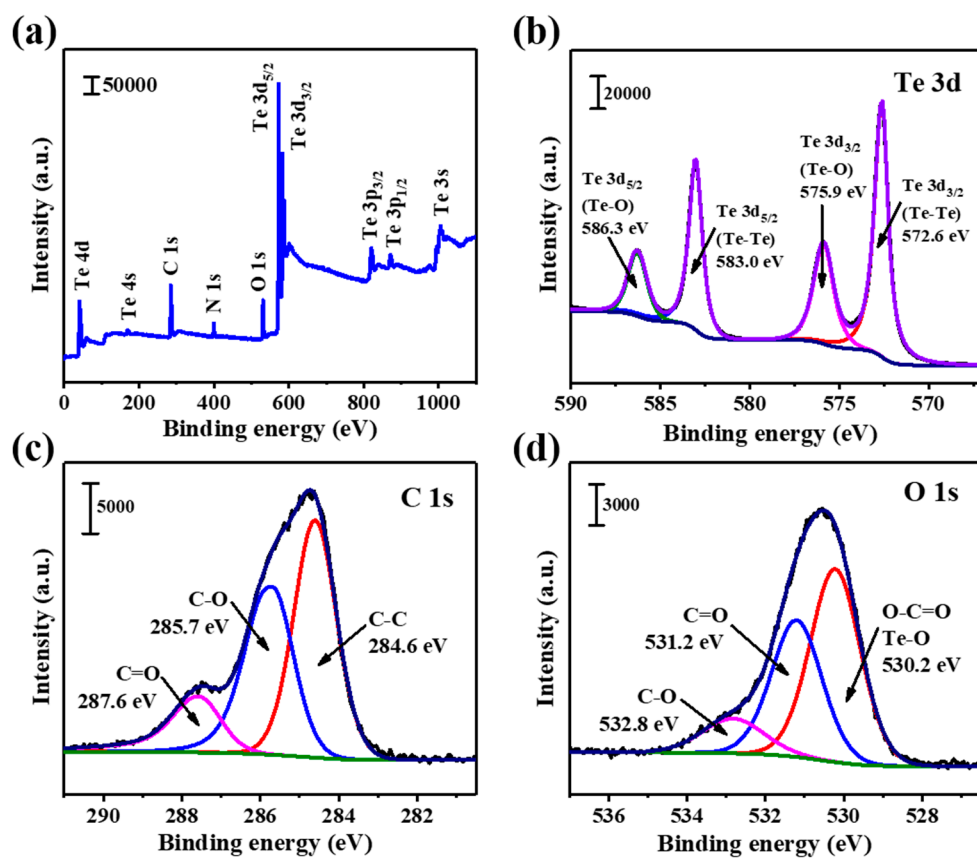

**Figure S7.** XPS spectra of (a) full spectrum, (b) Te 3d, (c) C 1s, and (d) O 1s of Te NRs/rGO-620.

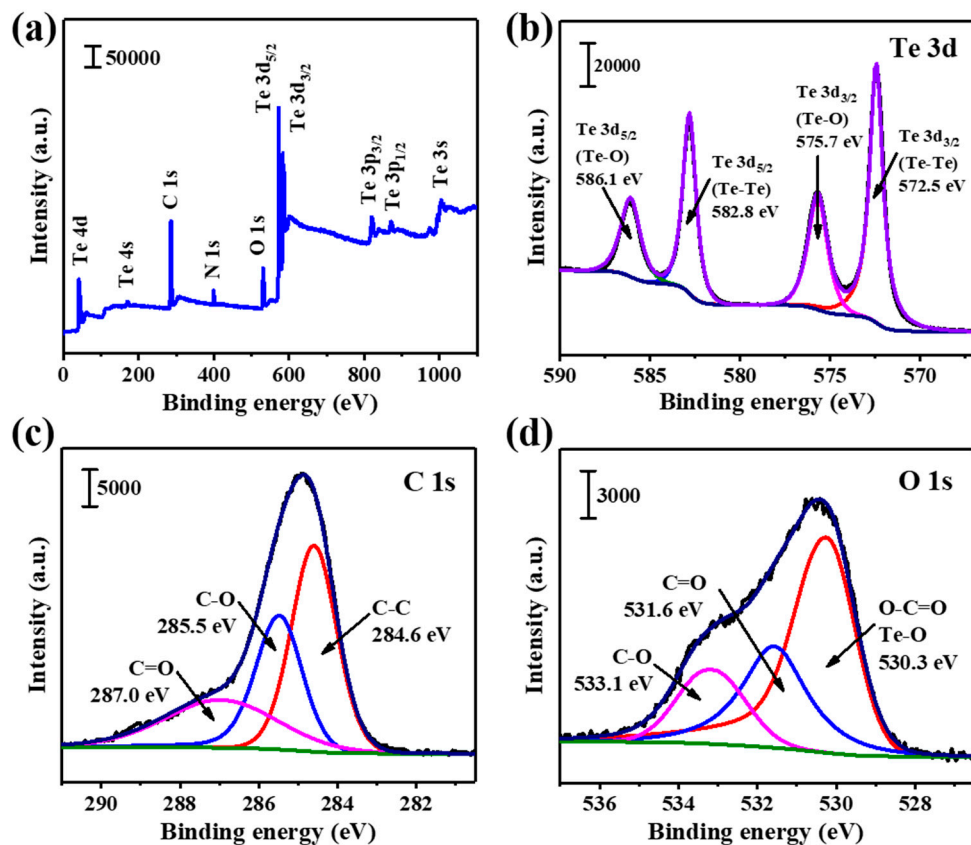

**Figure S8.** XPS spectra of (a) full spectrum, (b) Te 3d, (c) C 1s, and (d) O 1s of Te NRs/rGO-1240.

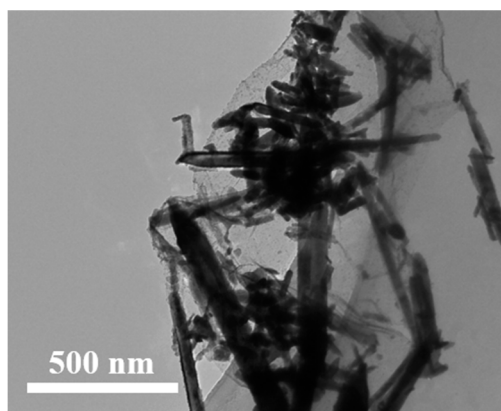

**Figure S9.** TEM image of Te/rGO composite.

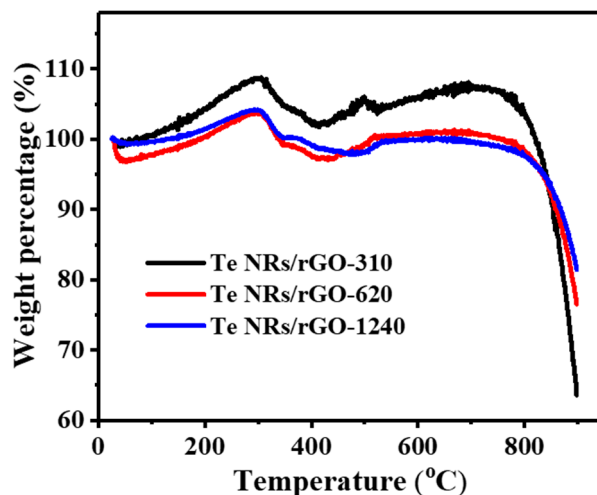

**Figure S10.** TGA spectra of Te NRs/rGO-310, Te NRs/rGO-620 and Te NRs/rGO-1240.

All the Te NRs/rGO composites were analyzed by TGA in the air to burn the rGO and leave Te as  $\text{TeO}_2$  in the ceramic pan. The weight change from 25 to 900°C is a combination of weight loss from the rGO oxidation to carbon dioxide,  $\text{C} + \text{O}_2 = \text{CO}_2$ , and weight increase due to the oxidation of tellurium,  $\text{Te} + \text{O}_2 = \text{TeO}_2$ . And the Te content was determined by using the following equation:

$$\text{Te (wt\%)} = \frac{\text{molecular weight of Te}}{\text{molecular weight of TeO}_2} \times \frac{\text{final weight of TeO}_2}{\text{initial weight of Te NRs/rGO}} \times 100$$

Using the above equation, the weight content of Te nanorods in Te NRs/rGO-310, Te NRs/rGO-620 and Te NRs/rGO-1240 is 85.7 wt%, 80.8 wt%, and 80.0 wt%, respectively.



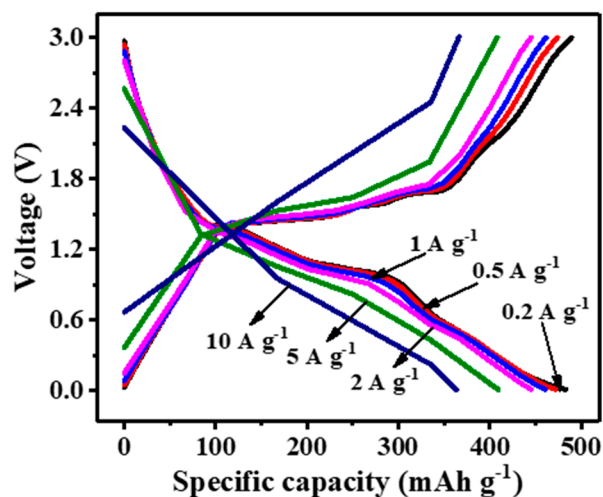

**Figure S11.** Charge-discharge profiles of Te NRs/rGO-310 at different current densities from 0.2 to 10 A g<sup>-1</sup>.

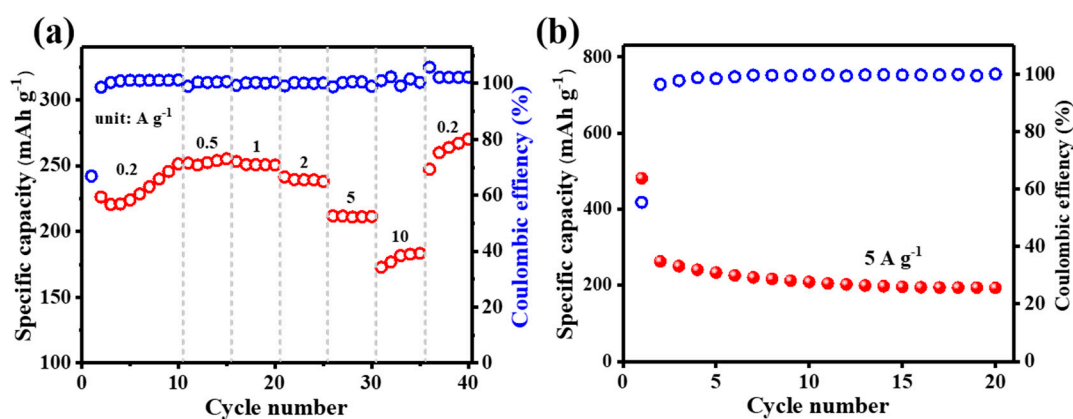

**Figure S12.** Electrochemical characterization of Te/rGO composite based Na metal cells with a 1 M NaPF<sub>6</sub> electrolyte in diglyme solvent. (a) Rate capability from 0.2 to 10 A g<sup>-1</sup> and (b) long cycling performance at 5 A g<sup>-1</sup>.

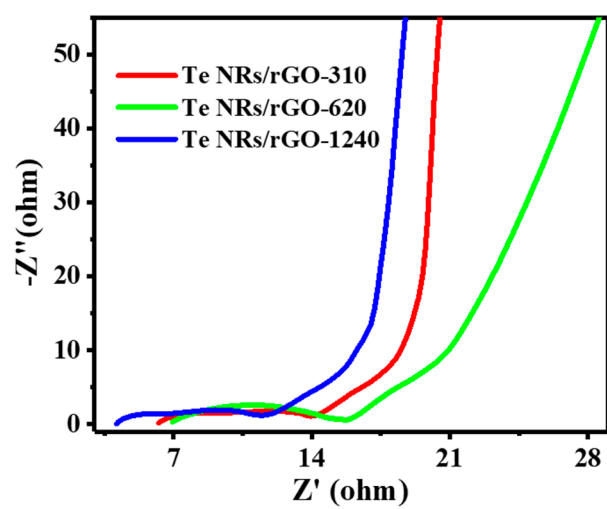

**Figure S13.** Nyquist plots of Te NRs/rGO-310, Te NRs/rGO-620 and Te NRs/rGO-1240 composites-based SIBs half-cell.

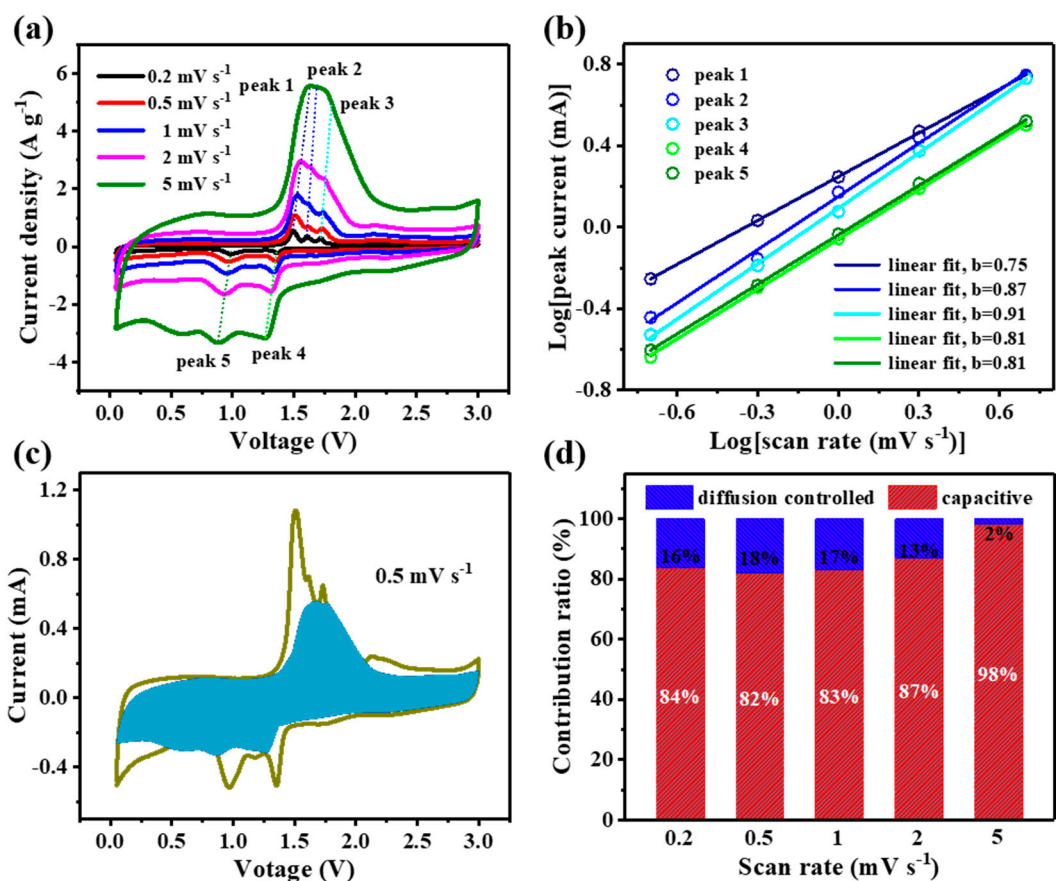

**Figure S14.** Kinetic analysis of Te NRs/rGO in SIBs half-cell: (a) CV curves at scan rates from  $0.2$  to  $5.0 \text{ mV s}^{-1}$ ; (b) relationship between  $\log i$  and  $\log v$  plots; (c) the capacitive contribution at  $0.5 \text{ mV s}^{-1}$ ; (d) capacitance contribution at various scan rates.

Table S1. Summary of nanorod length, width, and aspect ratio of Te NRs/rGO-310, Te NRs/rGO-620 and Te NRs/rGO-1240 composites

| Te NRs/rGO      | nanorod length<br>(nm) | nanorod width<br>(nm) | Aspect ratio   |
|-----------------|------------------------|-----------------------|----------------|
| Te NRs/rGO-310  | $104.2 \pm 12.2$       | $10.4 \pm 2.1$        | $10.3 \pm 1.6$ |
| Te NRs/rGO-620  | $166.5 \pm 15.7$       | $14.7 \pm 2.5$        | $11.7 \pm 2.5$ |
| Te NRs/rGO-1240 | $169.4 \pm 12.1$       | $16.0 \pm 2.2$        | $10.7 \pm 1.5$ |

Table S2 Summary of the representative Nano-Te based electrode materials for SIBs

| Materials                    | Preparation    | High rate capacity                               | Capacity retention                              | Ref.      |
|------------------------------|----------------|--------------------------------------------------|-------------------------------------------------|-----------|
| Te NRs/rGO                   | 50°C, 3 h      | 338 mAh g <sup>-1</sup> at 5 A g <sup>-1</sup>   | 93.4% after 500 cycles at 5 A g <sup>-1</sup>   | This work |
| Te/Cp                        | 480°C for 12 h | 302 mAh g <sup>-1</sup> at 0.8 A g <sup>-1</sup> | 68% after 1000 cycles at 3.2 A g <sup>-1</sup>  | [37]      |
| Nano-Te@C                    | 800°C, 3 h     | 303 mAh g <sup>-1</sup> at 0.8 A g <sup>-1</sup> | 90% after 1000 cycles at 0.06 A g <sup>-1</sup> | [29]      |
| NPCS/Te                      | 480°C for 6 h  | 382 mAh g <sup>-1</sup> at 0.2 A g <sup>-1</sup> | 79.3% after 100 cycles at 0.2 A g <sup>-1</sup> | [38]      |
| Te@CMK-3                     | 550°C, 6 h     | 230 mAh g <sup>-1</sup> at 0.8 A g <sup>-1</sup> | 98% after 95 cycles at 0.8 A g <sup>-1</sup>    | [36]      |
| Te/CeO <sub>2</sub> -QDs/HPC | 480°C for 20 h | 260 mAh g <sup>-1</sup> at 4 A g <sup>-1</sup>   | 93.8% after 1000 cycles at 4 A g <sup>-1</sup>  | [34]      |
